# Supplementary material for: Cationic and radical polymerization using a boron–thienothiophene–triphenylamine based D–π–A type photosensitizer under white LED irradiation
Source: Royal Society of Chemistry journal article supplement (doi:10.1039/d3me00083d), 2023-01-01
Supplement: d3me00083d1.pdf [file d3me00083d1.pdf]

## Supporting Information for

### Cationic and Radical Polymerization Using a Boron-Thienothiophene-Triphenylamine Based D- $\pi$ -A Type Photosensitizer Under White LED Irradiation

Ali Suerkan<sup>1</sup>, Recep Isci<sup>1\*</sup>, Turan Ozturk<sup>1,2</sup> and Yusuf Yagci<sup>1\*</sup>

<sup>1</sup>Department of Chemistry, Istanbul Technical University, 34469, Maslak, Istanbul, Turkey

<sup>2</sup>TUBITAK UME, Chemistry Group Laboratories, 41470, Gebze, Kocaeli, Turkey

Table of Contents:

|                                                                                                                                    |   |
|------------------------------------------------------------------------------------------------------------------------------------|---|
| <b>Figure S1.</b> A photoreactor capable of providing white LED.....                                                               | 2 |
| <b>Figure S2.</b> Network formation by photopolymerization: TEGDMA, PTEGDMA, BADGE and PBADGE respectively 1a, 1b, 2a, and 2b..... | 2 |
| <b>Figure S3.</b> Purified cross-linked polymers: PBADGE (1a) and PTEGDMA (2a).....                                                | 3 |
| <b>Figure S4.</b> Photographs of DMB-TT-TPA under UV light in different solvents.....                                              | 3 |
| <b>Figure S5.</b> GPC Traces of PSty, PIBVE, PMMA and PCHO.....                                                                    | 4 |
| <b>Figure S6.</b> <sup>1</sup> H-NMR Spectra of the polymers in CDCl <sub>3</sub> (500 MHz).....                                   | 4 |
| <b>Figure S7.</b> CV spectra of the polymers.....                                                                                  | 5 |
| <b>Figure S8.</b> CV calibration.....                                                                                              | 5 |

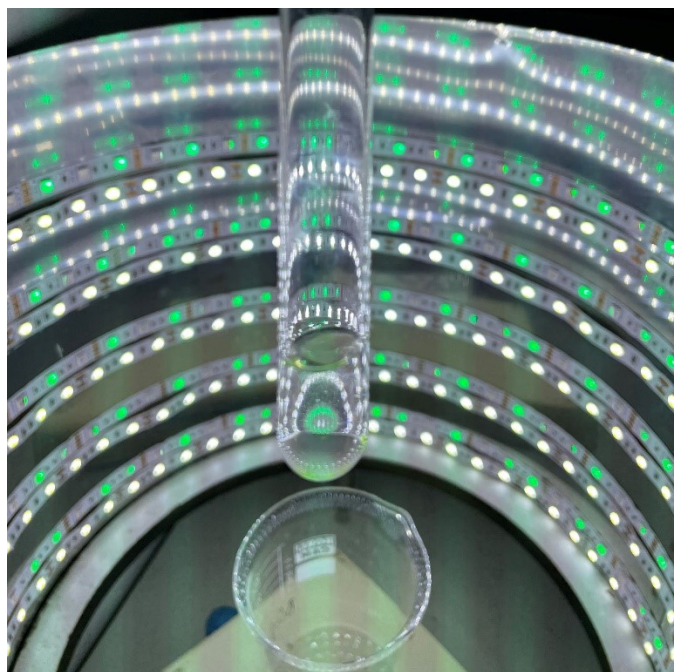

**Figure S1.** A photoreactor capable of providing white LED light.

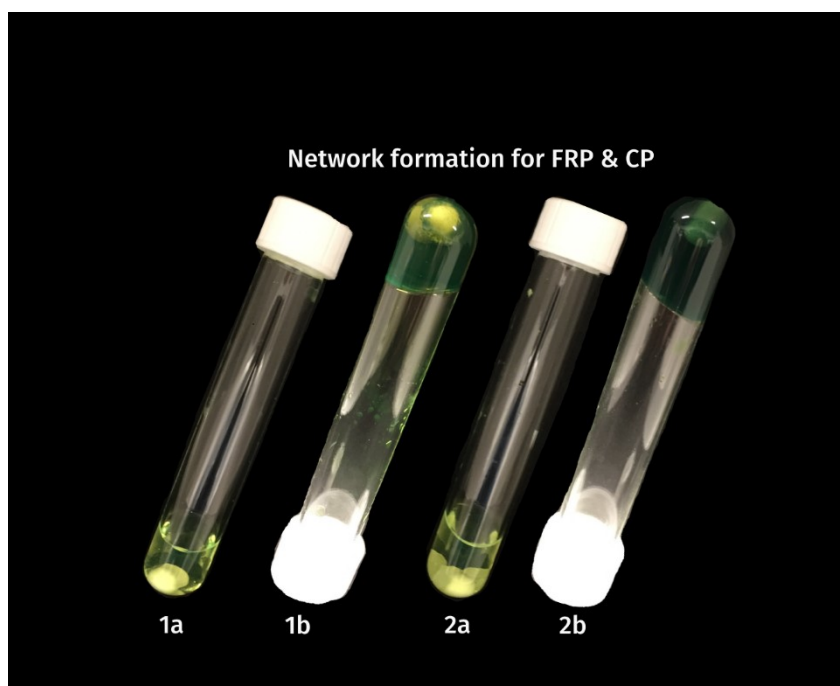

**Figure S2.** Network formation by photopolymerization: TEGDMA, PTEGDMA, BADGE and PBADGE respectively 1a, 1b, 2a, and 2b.

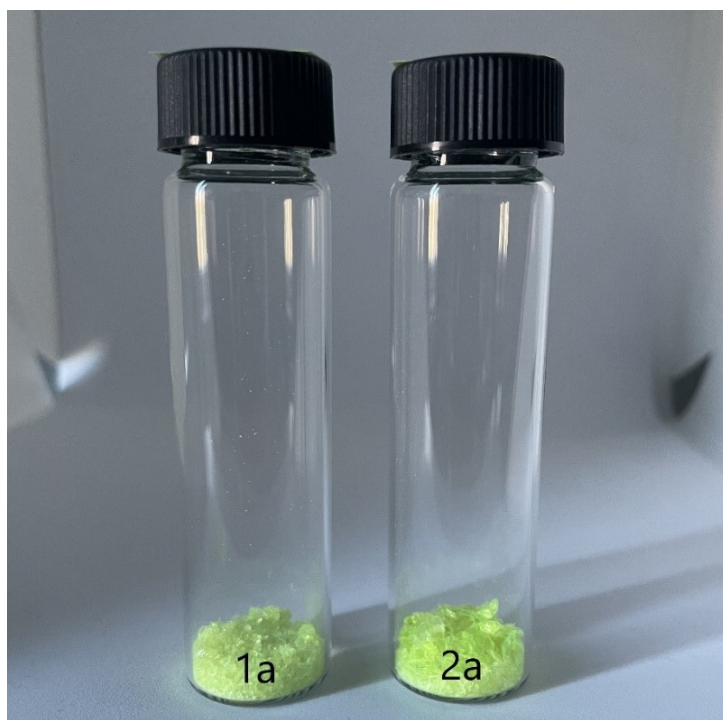

**Figure S3.** Purified cross-linked polymers: PBADGE (1a) and PTEGDMA (2a).

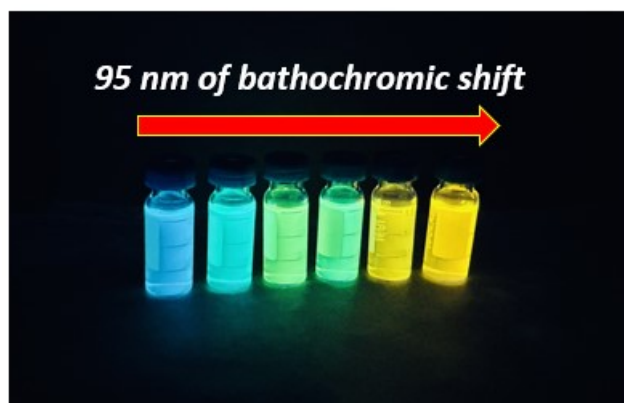

**Figure S4.** Photographs of **DMB-TT-TPA** under UV light in different solvents (from left to right; hexane, toluene, tetrahydrofuran, dichloromethane, acetonitrile and dimethyl sulfoxide, respectively.)

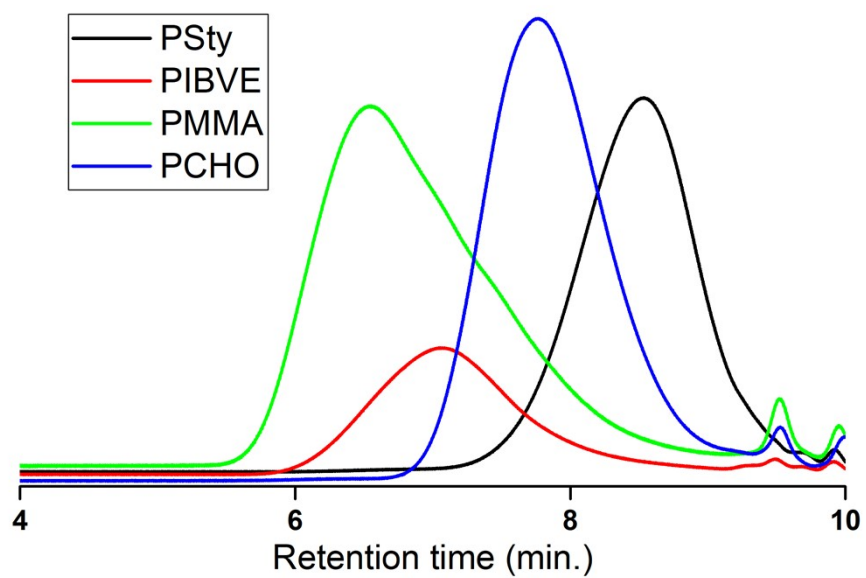

Figure S5. GPC Traces of PSty, PIBVE, PMMA and PCHO.

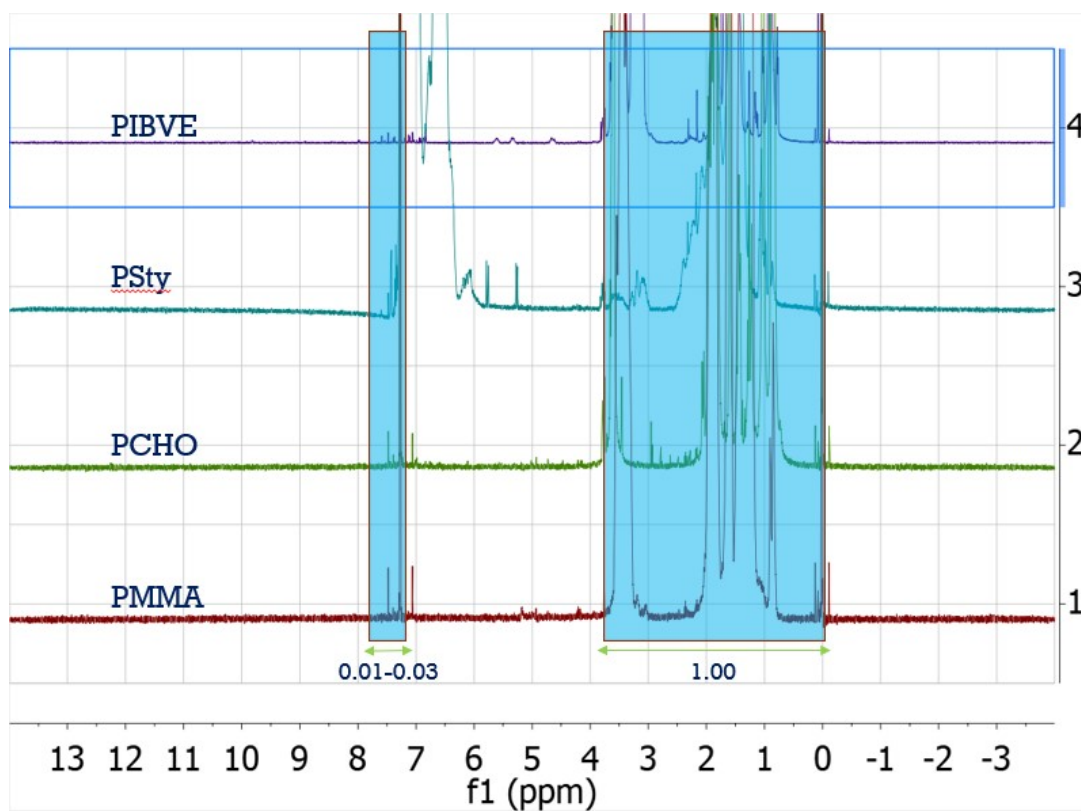

Figure S6. <sup>1</sup>H-NMR Spectra of the polymers in CDCl<sub>3</sub> (500 MHz).

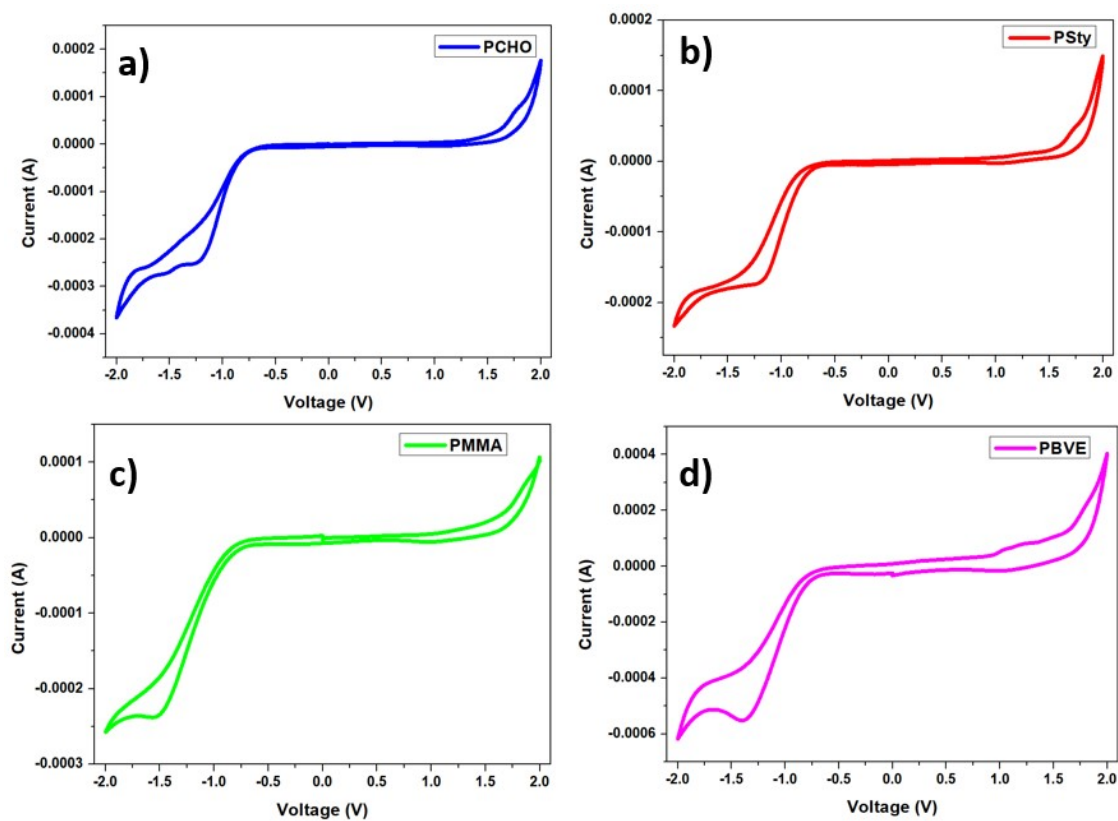

**Figure S7.** CV Spectra of the polymers (using **DMB-TT-TPA** sensitizer).

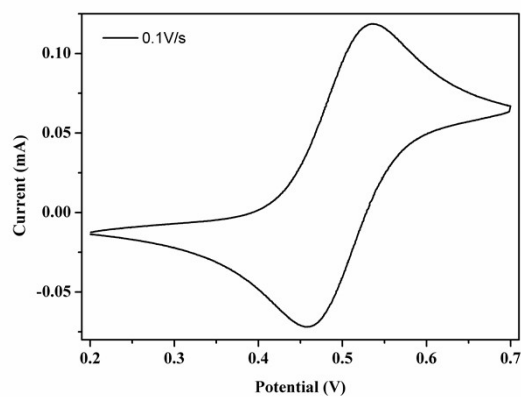

**Figure S8.** Cyclic voltammogram of ferrocene in 0.1 M TBAPF6 acetonitrile electrolyte; Pt working electrode, Pt counter, Ag wire reference, scan rate = 0.1 V s<sup>-1</sup>)
